# Emergence of belief-like representations through reinforcement learning

Jay A. Hennig<sup>1,2,\*</sup>, Sandra A. Romero Pinto<sup>2,3</sup>, Takahiro Yamaguchi<sup>3,4</sup>,  
Scott W. Linderman<sup>5,6</sup>, Naoshige Uchida<sup>2,3</sup>, Samuel J. Gershman<sup>1,2</sup>

<sup>1</sup> Department of Psychology, Harvard University, Cambridge, MA, USA

<sup>2</sup> Center for Brain Science, Harvard University, Cambridge, MA, USA

<sup>3</sup> Department of Molecular and Cellular Biology, Harvard University, Cambridge, MA, USA

<sup>4</sup> Future Vehicle Research Department, Toyota Research Institute North America, Toyota Motor North America Inc., Ann Arbor, MI, USA

<sup>5</sup> Wu Tsai Neurosciences Institute, Stanford University, Stanford, CA, USA

<sup>6</sup> Department of Statistics, Stanford University, Stanford, CA, USA

\* Corresponding author

Email: [jay.a.hennig@gmail.com](mailto:jay.a.hennig@gmail.com) (JAH)

## Abstract

1 To behave adaptively, animals must learn to predict future reward, or value. To do this, animals are thought  
2 to learn reward predictions using reinforcement learning. However, in contrast to classical models, animals  
3 must learn to estimate value using only incomplete state information. Previous work suggests that animals  
4 estimate value in partially observable tasks by first forming “beliefs”—optimal Bayesian estimates of the  
5 hidden states in the task. Although this is one way to solve the problem of partial observability, it is not the  
6 only way, nor is it the most computationally scalable solution in complex, real-world environments. Here  
7 we show that a recurrent neural network (RNN) can learn to estimate value directly from observations, gen-  
8 erating reward prediction errors that resemble those observed experimentally, without any explicit objective  
9 of estimating beliefs. We integrate statistical, functional, and dynamical systems perspectives on beliefs to  
10 show that the RNN’s learned representation encodes belief information, but only when the RNN’s capac-  
11 ity is sufficiently large. These results illustrate how animals can estimate value in tasks without explicitly  
12 estimating beliefs, yielding a representation useful for systems with limited capacity.

## 13 Author Summary

14 Natural environments are full of uncertainty. For example, just because my fridge had food in it yester-  
15 day does not mean it will have food today. Despite such uncertainty, animals can estimate which states  
16 and actions are the most valuable. Previous work suggests that animals estimate value using a brain area  
17 called the basal ganglia, using a process resembling a reinforcement learning algorithm called TD learning.  
18 However, traditional reinforcement learning algorithms cannot accurately estimate value in environments  
19 with state uncertainty (e.g., when my fridge’s contents are unknown). One way around this problem is if  
20 agents form “beliefs,” a probabilistic estimate of how likely each state is, given any observations so far.  
21 However, estimating beliefs is a demanding process that may not be possible for animals in more complex  
22 environments. Here we show that an artificial recurrent neural network (RNN) trained with TD learning  
23 can estimate value from observations, without explicitly estimating beliefs. The trained RNN’s error signals  
24 resembled the neural activity of dopamine neurons measured during the same task. Importantly, the RNN’s

25 activity resembled beliefs, but only when the RNN had enough capacity. This work illustrates how animals  
26 could estimate value in uncertain environments without needing to first form beliefs, which may be useful  
27 in environments where computing the true beliefs is too costly.

## 28 Introduction

29 One pervasive feature of animal behavior is the ability to predict future reward. For example, a dog may  
30 learn that when her owner picks up the leash, she is likely to be rewarded with a walk in the near future.  
31 In associative learning settings such as this one, animals learn to associate certain stimuli (e.g., her owner  
32 grabbing the leash) with future reward (e.g., a walk). The neural basis of associative learning has been  
33 interpreted through the lens of reinforcement learning (RL). In particular, one successful theoretical model  
34 posits that associative learning is driven by the activity of dopamine neurons in the midbrain, where spiking  
35 activity resembles the reward prediction error (RPE) signal in an RL algorithm called temporal difference  
36 (TD) learning [1, 2, 3, 4]. We will describe this algorithm in more detail below.

37 In many real-world scenarios, effectively predicting reward may require a deeper understanding of the  
38 structure of the world that goes beyond associating observations and reward. To continue the example  
39 above, suppose the dog's owner keeps his car keys under the leash. Now if he picks up the leash, this  
40 does not necessarily mean he is about to take his dog on a walk. In other words, his intention to take  
41 his dog on a walk is now "partially observable." Standard RL approaches are insufficient for learning in  
42 partially observable environments, as these methods assume that all relevant states of the environment are  
43 fully observable. One way to solve this problem is by using observations to form a Bayesian posterior  
44 estimate of each hidden state, called a *belief state* [5]. Future reward can then be estimated by applying  
45 standard RL methods like TD learning to belief states rather than the raw observations.

46 Do animals estimate future reward using belief states? Evidence for this idea is suggestive, although  
47 indirect. Previous experimental work has shown that the phasic activity of midbrain dopamine neurons  
48 resembles the RPEs of TD learning in partially observable environments, where TD learning is performed  
49 on belief states rather than observations [6, 7, 8, 9, 10, 11]. The brain may have dedicated machinery, perhaps  
50 in prefrontal cortex [12, 13], for computing belief states, which could then be provided to downstream areas,

51 such as the basal ganglia, to perform standard RL algorithms such as TD learning [14]. This architectural  
52 division of labor resonates with the broader literature on probabilistic computation in cortex, which has  
53 identified several different ways in which belief states could be encoded by neural activity [15].

54 There are a few difficulties in using a belief state to solve RL tasks. First, the belief state assumes  
55 knowledge of the environment's transition and observation dynamics—something that may be challenging  
56 for animals to acquire via observations alone. Indeed, there are well-documented examples of animals  
57 failing to learn or use the correct environment model [16]. Second, the belief representation does not scale  
58 well to more realistic tasks with higher-dimensional state spaces, as beliefs live in a continuous space whose  
59 dimensionality grows with the number of discrete states in the environment. Finally, the belief state includes  
60 knowledge about all states in the environment, regardless of whether those states are relevant to the task at  
61 hand. Luckily, one can often use approximate representations of beliefs to find solutions that work well in  
62 practice [17]. This suggests that there may be other representations, more compact than the full belief state,  
63 that are sufficient for the particular task of estimating future reward [18, 19].

64 To address these difficulties, here we take inspiration from deep reinforcement learning. In deep RL,  
65 rather than explicitly learning beliefs, an agent uses nonlinear function approximation to learn a hidden  
66 representation that is sufficient for performing the task [20]. Compared to the belief representation, this  
67 approach does not require explicit knowledge about the structure of the environment. It may also scale  
68 better to more complex tasks, by virtue of the agent not needing to represent any features of the environment  
69 that do not directly pertain to the task at hand. Because beliefs are a non-linear dynamical system, here  
70 we use recurrent neural networks (RNNs) as our nonlinear function approximator. This choice was also  
71 motivated by the observation from the machine learning literature that RNNs can perform well on complex  
72 partially observable tasks [21]. Previous work in computational neuroscience has explored whether RNNs  
73 can be used to directly compute beliefs [17]. Here, by contrast, we explore whether training RNNs in  
74 partially observable environments leads to their representations implicitly becoming more like beliefs.

75 We show that RNNs can be trained to perform two previously studied associative learning tasks [7, 10],  
76 reproducing experimentally observed dopamine neuron activity. We probe the representations learned by the  
77 RNNs, and show that the representations resemble beliefs from statistical, functional, and dynamical systems  
78 perspectives. Finally, we show how an RNN's capacity determines the degree to which its representation

79 resembles beliefs, without a concurrent impact on its ability to perform the task. These results illustrate  
80 how animals might estimate reward in partially observable environments without requiring any explicit  
81 representation of beliefs.

## 82 **Results**

### 83 **Reinforcement learning in partially observable environments using belief states**

The standard RL objective is to learn the expected discounted future return, or *value*, of each state:

$$V(s_t) = \mathbb{E} \left[ \sum_{k=0}^{\infty} \gamma^k r_{t+k} \right] \quad (1)$$

84 where  $s_t \in \mathcal{S}$  is the state of the environment at time  $t$ ,  $0 \leq \gamma < 1$  is a discount factor, and  $r_t$  is the reward.  
85 Rewards are random variables that depend on the environment state, and  $\mathbb{E}$  denotes an expectation over the  
86 potentially stochastic sequences of states and rewards. Because we are interested in modeling Pavlovian  
87 associative learning tasks, here we will assume there are no actions available to the agent. For notational  
88 simplicity, we will use the shorthand  $V_t = V(s_t)$ .

TD learning estimates the value function by exploiting a set of Markovian assumptions about the environment: the probability of state  $s_t$  depends only on the last state  $s_{t-1}$ , and the probability of reward  $r_t$  depends only on the current state  $s_t$ . Under these assumptions, the value function can be decomposed into a recursive form known as the *Bellman equation* [22]:

$$V_t = \mathbb{E}[r_t + \gamma V_{t+1}]. \quad (2)$$

If an agent has access to an approximation of the value function,  $\widehat{V}_t$ , along with sample paths of states and rewards, then it can compute an estimate of the discrepancy between the approximate and true value function by taking the difference between the two sides of the Bellman equation:

$$\delta_t = r_t + \gamma \widehat{V}_{t+1} - \widehat{V}_t. \quad (3)$$

This is the temporal difference error, the precise definition of the RPE used in TD learning. Under the Bellman equation,  $\mathbb{E}[\delta_t] = 0$  when  $\widehat{V}_t = V_t$ . If  $\widehat{V}_t$  is determined by a set of adaptable parameters  $\theta$ , the approximation can be improved by following the stochastic gradient of the squared TD error:

$$\Delta\theta = \eta\delta_t\nabla_{\theta}\widehat{V}_t, \quad (4)$$

where  $0 < \eta < 1$  is a learning rate, and  $\nabla_{\theta}\widehat{V}_t$  is the gradient of  $\widehat{V}_t$  with respect to  $\theta$ . One common example is a linear function approximator:

$$\widehat{V}_t = \sum_{d=1}^D w(d)z_t(d), \quad (5)$$

89 where  $z_t(d) \in \mathbb{R}$  is some feature (indexed by  $d$ ) of the state, and  $\theta = \mathbf{w} \in \mathbb{R}^D$  is a learned set of weights  
 90 on all the features. Under this approximation,  $\nabla_{\theta}\widehat{V}_t = \mathbf{z}_t$ .

91 In a partially observable Markov process, agents do not observe the state  $s_t$  directly, but instead observe  
 92 only observations  $o_t \in \mathcal{O}$ . Critically, observations are not in general Markovian, which means that TD  
 93 learning methods cannot be naively applied to value function approximators defined over observations. One  
 94 way of understanding this is to note that the value of an observation may depend on the long-term past [23].  
 95 In the dog leash example from the Introduction, the value (to the dog) of her owner picking up the leash  
 96 depends on the history of events leading up to that moment—for example, if her owner recently announced  
 97 that his car keys were missing. Reward prediction requires a compression of this history into a “sufficient  
 98 statistic”—in effect creating a transformed state space over which the Markov property holds. TD learning  
 99 can then be applied to this transformed state space.

One such transformed state is the posterior probability distribution over hidden states given the history of observations, also known as the *belief state* [5]:

$$\begin{aligned} b_t(s_t) &= P(s_t \mid o_1, \dots, o_t) \\ &\propto P(o_t \mid s_t) \int P(s_t \mid s_{t-1}) b_{t-1}(s_{t-1}) \partial s_{t-1} \end{aligned} \quad (6)$$

100 where the recursion follows from the Chapman-Kolmogorov equation, which stipulates how to update the

101 belief state from  $t - 1$  to  $t$  after observing observation  $o_t$ .

For a partially observable Markov process with a finite state space,  $\mathcal{S} = \{1, \dots, K\}$ , the value function can be written as a weighted combination of beliefs:

$$V_t = \sum_{k=1}^K V(k)b_t(k) \quad (7)$$

102 where  $V(k)$  and  $b_t(k)$  are the value and belief of state  $s_t = k$ , respectively. This means that linear value  
103 function approximation in Eqn. (5) is sufficiently expressive for the partially observable problems we con-  
104 sider in this paper: with enough training data, the value function approximator will perfectly estimate the  
105 true value function (i.e., given learned weights  $w(k) = V(k)$  and features  $z_t(k) = b_t(k)$  for each  $k \in K$ ).

106 This motivates a straightforward model of how animals estimate value in partially observable environ-  
107 ments [6, 7], which we will refer to as the “Belief model”: First compute beliefs (Eqn. (6)), and then  
108 compute a linear transformation of those beliefs to a value estimate (Eqn. (7)), with weights obtained from  
109 TD learning.

## 110 **Learning state representations using recurrent neural networks**

The Belief model assumes animals use a particular feature representation (i.e., beliefs) for estimating value. Here we ask what representations might emerge from solving the task of estimating value alone. It is useful to note that the Belief model can be written as follows:

$$\widehat{V}_t = \mathbf{w}^\top \mathbf{b}_t \quad (8)$$

$$\mathbf{b}_t = P(s_t | o_1, \dots, o_t) \quad (9)$$

$$= P(s_t | \mathbf{b}_{t-1}, o_t)$$

$$= f_\phi(\mathbf{b}_{t-1}, o_t)$$

where  $f$  is a function parameterized by a specific choice of (fixed) parameters  $\phi$ , and only  $\mathbf{w}$  is learned. This latter equation has the same form as a generic recurrent neural network (RNN). This suggests a model

could learn its own representation by treating  $\phi$  as a learnable parameter. Taken together, this results in the following model for estimating value:

$$\widehat{V}_t = \mathbf{w}^\top \mathbf{z}_t \quad (10)$$

$$\mathbf{z}_t = f_\phi(\mathbf{z}_{t-1}, o_t) \quad (11)$$

111 where  $\mathbf{z}_t \in \mathbb{R}^H$  is the activity of an RNN with  $H$  hidden units and parameters  $\phi$ . Importantly, both  $\phi$  and  $\mathbf{w}$   
112 can be learned simultaneously, using backpropagation through time to calculate Eqn. (4) with  $\theta = [\phi \ \mathbf{w}]$ .  
113 This allows the network to learn the representations,  $\mathbf{z}_t$ , that are sufficient for estimating value. We will  
114 refer to this model as a “Value RNN” (see Materials and Methods).

115 Importantly, this RNN-based approach resolves all three challenges for learning a belief representation  
116 that we raised in the Introduction: 1) The model can learn from observations alone, as no information is  
117 provided about the statistics of the underlying environment; 2) the model’s size (parameterized by  $H$ , the  
118 number of hidden units) can be controlled separately from the number of states in the environment; and 3)  
119 the model’s only objective is to estimate value.

120 Though such a model has no explicit objective of learning beliefs, the network may discover a belief  
121 representation implicitly. We next asked what signatures, if any, would indicate the existence of a belief  
122 representation. In the sections that follow we develop an analytical approach for determining whether the  
123 Value RNN’s learned representations resemble beliefs.

## 124 **RNNs learn belief-like representations**

125 As a working example, we will consider the probabilistic associative learning paradigm where dopamine  
126 RPEs were shown to be consistent with a belief representation [7, 13]. This has the added benefit of ensuring  
127 that the RNN-based approach described above can recapitulate these previous results.

128 This paradigm consisted of two tasks, which we will refer to as Task 1 and Task 2 (Fig 1). In both tasks,  
129 mice were trained to associate an odor cue with probabilistic delivery of a liquid reward 1.2-2.8s later. The  
130 tasks were each composed of two states: an intertrial interval (ITI), during which animals waited for an



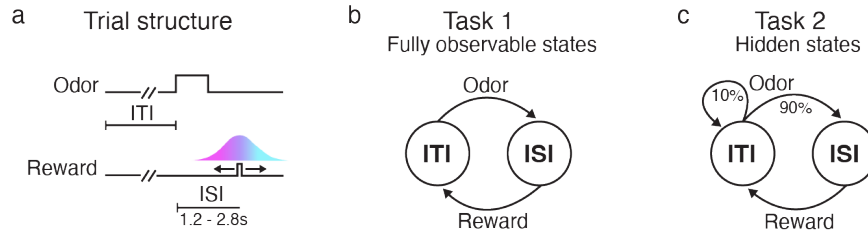

**Fig 1. Associative learning tasks with probabilistic rewards and hidden states. a.**

Trial structure in Starkweather et al. [7, 13]. Each trial consisted of a variable delay (the intertrial interval, or ITI), followed by an odor, a second delay (the interstimulus interval, or ISI), and a potential subsequent reward. Reward times were sampled from a discretized Gaussian ranging from 1.2-2.8s (see Materials and Methods). **b-c.** In both versions of the task, there were two underlying states: the ITI and the ISI. In Task 1, every trial was rewarded. As a result, an odor always indicated a transition from the ITI to the ISI, while a reward always indicated a transition from the ISI to the ITI. In Task 2, rewards were omitted on 10% of trials; as a result, an odor did not reveal whether or not the state transitioned to the ISI.

131 odor; and an interstimulus interval (ISI), during which animals waited for a reward. In Task 1, every trial  
132 contained both an odor and a reward. As a result, the animal's observations could fully disambiguate the  
133 underlying state: An odor signaled a transition to the ISI state, while a reward signaled a transition to the  
134 ITI state. In Task 2, by contrast, reward on a given trial was omitted with 10% probability. This meant the  
135 underlying states were now only partially observable; for example, in Task 2 an odor signaled a transition to  
136 the ISI state with 90% probability.

137 To formalize these tasks, we largely followed previous work [7, 13]. Each task was modeled as a  
138 discrete-time Markov process with states  $s_t \in \{1, \dots, K\}$ , where each  $t$  denotes a 200ms time bin (Fig 2A).  
139 These  $K$  "micro" states can be partitioned into those belonging to one of two "macro" states (corresponding  
140 to the ITI and the ISI; see Materials and Methods). At each point in time, the agent's observation is one of  
141  $o_t \in \{\text{odor}, \text{reward}, \text{null}\}$  (Fig 2B). For each task, we trained the Belief model, and a Value RNN (using  
142 a gated-recurrent unit cell [24], or GRU, with  $H = 50$  hidden units), on a series of observations from that  
143 task to estimate value using TD learning (see Materials and Methods). Before training, the Value RNN's  
144 representation consisted of transient responses to each observation (Fig S1). After training, we evaluated  
145 each model on a sequence of new trials from the same task (Fig 2C).

146 To confirm that this approach could recapitulate previous results, we measured the RPEs generated by

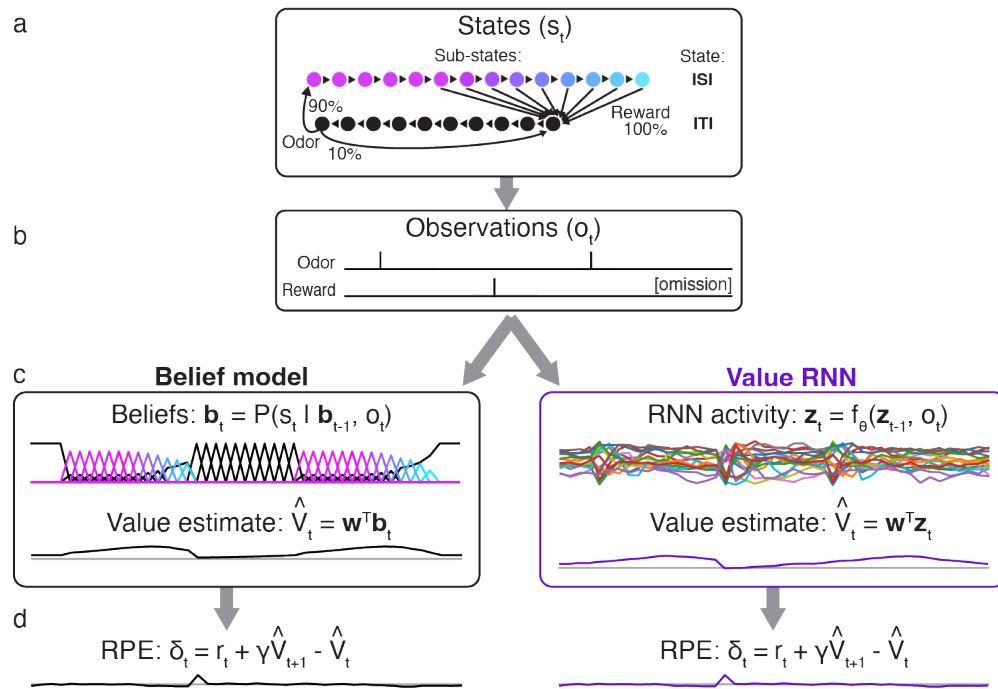

**Fig 2. Observations, model representations, value estimates, and reward prediction errors (RPEs) during Task 2.** **a.** State transitions and observation probabilities in Task 2. Each macro-state (ISI or ITI) is composed of micro-states denoting elapsed time; this allows for probabilistic reward times and minimum dwell times in the ISI and ITI, respectively. **b.** Observations emitted by Task 2 during two example trials. Note that omission trials are indicated only implicitly as the absence of a reward observation. **c.** Example representations ( $\mathbf{b}_t$ ,  $\mathbf{z}_t$ ) and value estimates ( $\hat{V}_t$ ) of two models (Belief model, left; Value RNN, right) for estimating value in partially observable environments, after training. **d.** After training, both models exhibit similar RPEs.

147 each trained model (Fig 2D). Previous work showed that dopamine RPEs depended on the reward time  
 148 differently in the two tasks, with RPEs increasing as a function of reward time in Task 1, but decreasing  
 149 as a function of reward time in Task 2 [7] (Fig 3A). As in previous work, we found that this pattern was  
 150 also exhibited by the Belief model (Fig 3B). We found that the RPEs of the Value RNN exhibited the same  
 151 pattern (Fig 3C). In particular, the Value RNN's RPEs became nearly identical to those of the Belief model  
 152 after training (Fig 3D). We emphasize that the Value RNN was not trained to match the value estimate from  
 153 the Belief model; rather, it was trained via TD learning using only observations. This result shows that,  
 154 through training on observations alone, Value RNNs discovered a representation that was sufficient for both  
 155 learning the value function as well as explaining empirical dopamine activity.

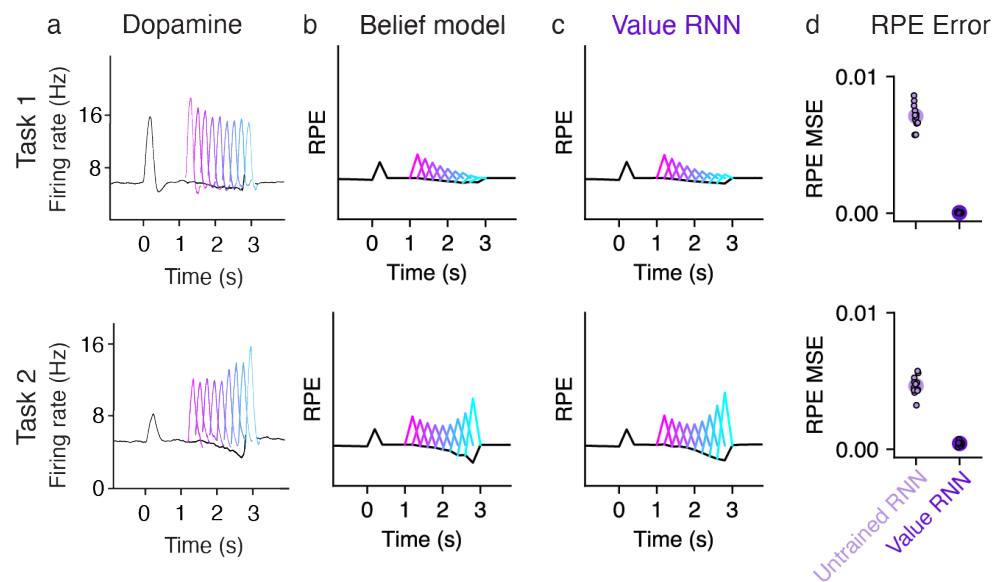

**Fig 3. RPEs of the Value RNN resemble both mouse dopamine activity and the Belief model.** **a.** Average phasic dopamine activity in the ventral tegmental area (VTA) recorded from mice trained in each task separately. Black traces indicate trial-averaged RPEs relative to an odor observed at time 0, prior to reward; colored traces indicate the RPEs following each of nine possible reward times. RPEs exhibit opposite dependence on reward time across tasks. Reproduced from Starkweather et al. [7]. **b-c.** Average RPEs of the Belief model and an example Value RNN, respectively. Same conventions as panel **a.** **d.** Mean squared error (MSE) between the RPEs of the Value RNN and Belief model, before and after training each Value RNN. Small dots depict the MSE of each of  $N = 12$  Task 1 RNNs and  $N = 12$  Task 2 RNNs, and circles depict the median across RNNs.

156 We next asked whether the Value RNN learned these tasks by forming representations that resembled  
 157 beliefs. We considered three approaches to answering this question. First, we asked whether beliefs could

158 be linearly decoded from the RNN’s activity. Next, because beliefs are the optimal estimate of the true state  
159 in the task, we asked whether RNN activity could similarly be used to decode the true state. Finally, we took  
160 a dynamical systems perspective, and asked whether the RNN and beliefs had similar dynamical structure.

### 161 **RNN activity readout was correlated with beliefs**

We first asked whether the Value RNN’s activity was correlated with beliefs. Because the belief and RNN representations did not necessarily have the same dimensionality, we performed a multivariate linear regression to find the linear transformation of the RNN’s activity that came closest to matching the beliefs (see Materials and Methods). In other words, we found the linear transformation,  $\widehat{W} \in \mathbb{R}^{K \times H}$ , that could map the RNN’s activity,  $z_t \in \mathbb{R}^H$ , to best match the belief vector,  $b_t \in \mathbb{R}^K$ :

$$\widehat{W} = \operatorname{argmin}_W \sum_{t=1}^T \|W z_t - b_t\|_2^2$$

162 To quantify performance, we used held-out sessions to measure the total variance of the beliefs that were  
163 explained by the linear readout of RNN activity ( $R^2$ ; see Materials and Methods). We found that the Value  
164 RNN’s activity explained most of the variance of beliefs (Fig 4B; Task 1  $R^2$ :  $0.69 \pm 0.01$ , mean  $\pm$  SE,  
165  $N = 12$ ; Task 2  $R^2$ :  $0.76 \pm 0.02$ , mean  $\pm$  SE,  $N = 12$ ), substantially above the performance when using  
166 the RNN activity before training (Task 1  $R^2$ :  $0.47 \pm 0.00$ , mean  $\pm$  SE,  $N = 12$ ; Task 2  $R^2$ :  $0.50 \pm$   
167  $0.00$ , mean  $\pm$  SE,  $N = 12$ ). This is not a trivial result of the network’s training objective, as the Value  
168 RNN’s target (i.e., value) is only a 1-dimensional signal, whereas beliefs are a  $K$ -dimensional signal (here,  
169  $K = 25$ ). Nevertheless, we found that training the Value RNN to estimate value resulted in its representation  
170 becoming more belief-like, in the sense of encoding more information about beliefs.

### 171 **RNN activity could be used to decode hidden states**

172 The previous analysis assessed how much information about beliefs was encoded by RNN activity. Given  
173 that beliefs are distributions over hidden states, we asked whether the ground truth state could be decoded  
174 from the RNN’s activity. To do this, we performed a multinomial logistic regression to find a linear trans-  
175 formation of the RNN’s activity that maximized the log-likelihood of the true states (see Materials and

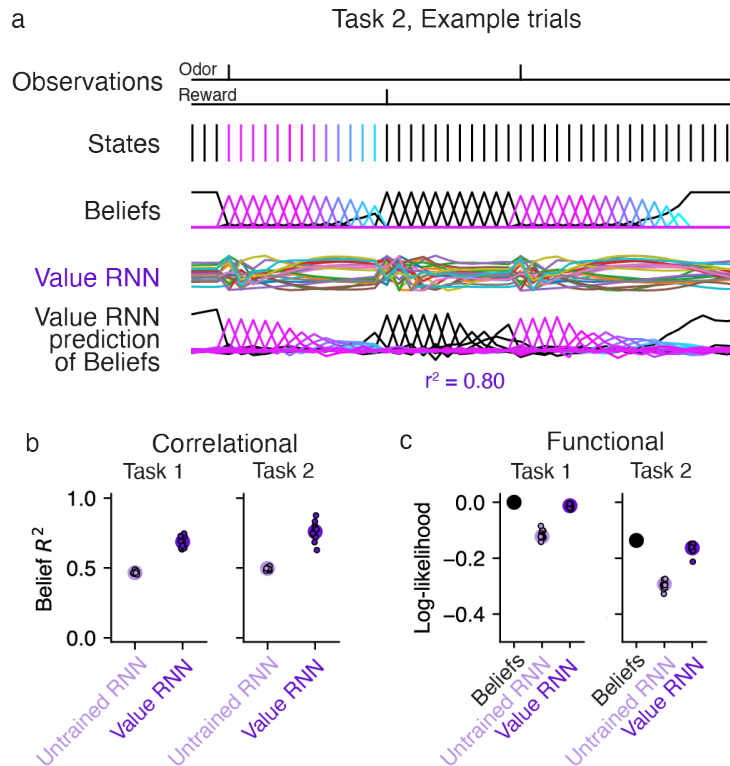

**Fig 4. Value RNN activity readout was correlated with beliefs and could be used to decode hidden states.** **a.** Example states, beliefs, and Value RNN activity from the same Task 2 trials shown in Fig 2. Note that the states following the second odor observation remain in the ITI (black) because the second trial is an omission trial. Bottom traces depict the linear transformation of the RNN activity that comes closest to matching the beliefs. Total variance explained ( $R^2$ ) is calculated on held-out trials. **b.** Total variance of beliefs explained ( $R^2$ ), on held-out trials, using different trained and untrained Value RNNs, in both tasks. Same conventions as Fig 3D). **c.** In purple, the cross-validated log-likelihood of linear decoders trained to estimate true states using RNN activity. Same conventions as Fig 3D). Black circle indicates the log-likelihood when using the beliefs as the decoded state estimate (i.e., no decoder is “trained”).

176 Methods). We quantified performance on held-out sessions by evaluating the log-likelihood of the decoded  
177 estimates. Because the beliefs capture the posterior distribution of the state given the observations under the  
178 true generative model, the log-likelihood of the beliefs serves as a ceiling on performance. We found that  
179 the log-likelihoods of the decoders trained on the RNN's activity approached those of the beliefs, and easily  
180 outperformed the decoders that used the activity of untrained RNNs (Fig 4C). Thus, training the RNN to  
181 estimate value resulted in a representation that could be used to more accurately decode the true state.

## 182 **RNN activity exhibited belief-like dynamics**

183 One potential shortcoming of the above analyses is that we have not yet accounted for the dynamical nature  
184 of the belief representation: Belief updating can be thought of as a dynamical system describing how the  
185 posterior probability of each state evolves as a function of the observations. We therefore took a dynamical  
186 systems perspective [25, 26, 27] and asked whether the dynamics of RNN activity resembled the dynamics  
187 of the beliefs in each task.

188 We first asked whether beliefs and RNNs had similar fixed point structure, a standard approach to  
189 characterizing the computations performed by dynamical systems [25, 26, 27]. Here, a “fixed point” is  
190 a belief state that remains unchanged in the absence of any new observations. Specifically, we considered  
191 the fixed points of beliefs in the absence of observations (Fig 5A). In both tasks, the duration of the ITI is  
192 sampled from a geometric distribution, which has a constant hazard function. Thus, if the agent believes  
193 it is in the ITI (i.e., waiting for an odor), it should maintain this belief for as long as it receives no new  
194 observations ( $\emptyset$ ). Thus, the ITI belief state is a fixed point of the belief updates in both tasks (Fig 5A).  
195 Now consider when the agent is in the ISI (e.g., following an odor observation). In Task 2 (Fig 5A, bottom  
196 panel), the agent should maintain a nonzero belief in the ISI only for as long as there are possible reward  
197 times remaining—i.e., the first 2.8s, or 14 time steps—but after that point it should return to the ITI state.  
198 Thus, the ITI state is the only fixed point of the Task 2 beliefs. In Task 1, by contrast, there are no omission  
199 trials, and so the beliefs are simply undefined when there are no observations for more than 14 time steps.  
200 Nevertheless, for the purposes of characterizing the fixed points of beliefs, we can ask what an agent with  
201 Task 1 beliefs *could* do when faced with an omission trial. In this sense, an agent could maintain a belief in

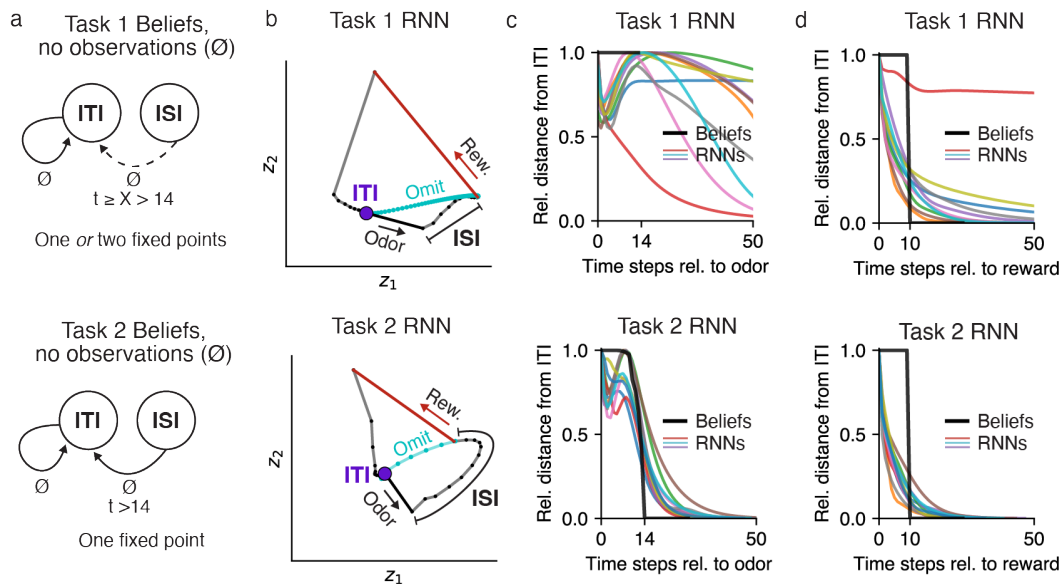

**Fig 5. Value RNN dynamics resembled belief dynamics in each task.** **a.** Dynamics of beliefs in Task 1 (top) and Task 2 (bottom). Black arrows indicate transitions between states in the absence of observations ( $\emptyset$ ) as a function of elapsed time,  $t$ , following an odor observation. ‘X’ indicates an unconstrained duration, and a dashed arrow indicates a transition that happens only when ‘X’ is finite. **b.** RNN activity at each time step (small black dots with connected lines) during an example trial in a 2D subspace identified using PCA. Putative ITI fixed point indicated as purple circle. Vectors indicate the response to odor (black) and reward (red). Activity during an omission trial is shown in cyan, though note that omission trials were present in training data only for Task 2. **c-d.** Average normalized distance of each model’s activity from its fixed point (identified numerically) following an odor (panel c) or reward (panel d) observation, over time. To allow comparing distances across models, each model’s distances were normalized by the maximum distance following each observation.

202 the ISI for any number of time steps  $X > 14$ , resulting in two fixed points when  $X \rightarrow \infty$ , and one fixed  
 203 point otherwise (Fig 5A, top panel). Thus, Task 1 beliefs can decay to the ITI fixed point at *any* point after  
 204 14 time steps, and may potentially have two fixed points.

205 We asked whether the Value RNNs in each task exhibited similar dynamics. To build intuition, for each  
 206 task we visualized the activity of a Value RNN on example trials (Fig 5B). To visualize the activity of the  
 207 RNN’s 50 units, we used principal components analysis (PCA) to project the RNN’s activity into the top  
 208 two dimensions that captured the most variance of the activity across trials; these two dimensions explained  
 209 83% and 79% of the total variance in the Task 1 and Task 2 Value RNN, respectively. We observed that  
 210 each RNN’s activity was quite stable during the ITI (purple circle), suggestive of a fixed point. This activity

211 was then perturbed by an odor observation (black vector), and continued to move through state space during  
212 the ISI. On rewarded trials, in response to a reward (red vector), RNN activity gradually returned to the  
213 same ITI location it started from (purple circle). We noted that the activity of both RNNs would also have  
214 converged to its original ITI location had the reward been omitted (cyan traces). Interestingly, this was true  
215 even for the Task 1 RNN, which did not experience omission trials during training. These visualizations  
216 suggested that these two example Value RNNs had a single fixed point (corresponding to the ITI), which  
217 we then confirmed numerically (see Materials and Methods). We next used the same numerical approach to  
218 identify the fixed points across all trained Value RNNs, and found similar results. In fact, only two Value  
219 RNNs had more than one fixed point; these were both Task 1 RNNs, which had a fixed point for both the ITI  
220 and the ISI. Overall, these analyses indicated that Value RNNs had a fixed point structure consistent with  
221 those of beliefs.

222 Despite the fact that most Value RNNs had a single fixed point regardless of which task they were  
223 trained on, we noted that the temporal dynamics of RNN activity differed across the two tasks following  
224 odor observations. For example, in the Task 2 RNN, following an odor observation, the activity moved  
225 gradually closer to the ITI state throughout the ISI (Fig 5B, bottom subpanel). These dynamics allowed the  
226 Task 2 RNN's activity to return to the ITI state at the appropriate time on trials without reward (cyan trace).  
227 By contrast, in the Task 1 RNN, which did not experience trials without rewards during training, activity  
228 took much longer to return to the ITI. To quantify these differences, we initialized each RNN to its fixed  
229 point, provided an odor observation, and then measured the RNN's activity over time in the absence of any  
230 subsequent reward. We then measured the distance of each RNN's activity over time from its ITI fixed point  
231 (Fig 5C, colored traces).

232 We repeated this same analysis for beliefs (Fig 5C, black trace), allowing us to characterize the two  
233 models' responses to an odor as a function of the distance of their representations from their ITI fixed point.  
234 We reasoned that, if the RNNs learned belief-like dynamics, the activity of Task 2 RNNs should return to  
235 the ITI as soon as possible after time step 14 (i.e., the largest reward time), which we found was largely  
236 the case (Fig 5C). By contrast, in Task 1, beliefs are undefined past time step 14 (because there are no  
237 omission trials), and so the activity of RNNs after this point was not constrained by the task. To quantify  
238 these differences across tasks, we calculated the time step at which each RNN's activity returned within



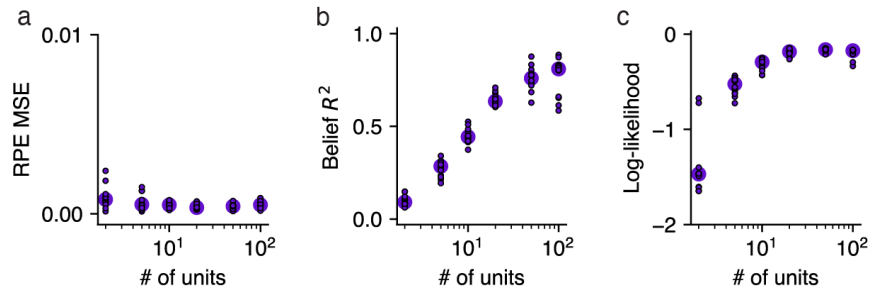

**Fig 6. Value RNNs with larger capacity had more belief-like representations.** **a.** Error between the Value RNN’s RPEs and those of the Belief model (“RPE MSE”; see Fig 3D) during Task 2, as a function of the number of units in the Value RNN. Each circle indicates the median across the  $N = 12$  Value RNNs with the same number of units. **b.** Total variance explained ( $R^2$ ) of beliefs (see Fig 4B). Same conventions as panel **a**. **c.** Log-likelihood of the state decoder using Value RNN activity to estimate the true state (see Fig 4C). Dashed line indicates maximum possible log-likelihood (i.e., from Belief model). Same conventions as panel **a**.

239 some threshold distance of its ITI fixed point. We refer to this quantity—which essentially measures ‘X’ in  
240 the top panel of Fig 5A—as the network’s *odor memory*. In fact, we found that *all* Task 1 RNNs had longer  
241 odor memories ( $310 \pm 150$ , mean  $\pm$  SE,  $N = 12$ ) than Task 2 RNNs ( $49 \pm 2$ , mean  $\pm$  SE,  $N = 12$ ). Overall,  
242 these features were consistent with the beliefs in the two tasks following an odor observation: beliefs in Task  
243 2, but not Task 1, must quickly return to the ITI after the maximum possible reward time. We performed a  
244 similar analysis for reward observations, in which case the network activity in both tasks was expected to  
245 return to the ITI fixed point shortly after the minimum ITI duration (at time step 10). Here, we found that  
246 the activity of both Task 1 and Task 2 RNNs quickly returned to the ITI fixed point after this point (Fig 5D),  
247 again consistent with the beliefs in these tasks.

## 248 **RNNs with larger capacity had more belief-like representations**

249 Thus far, we have considered the representations of Value RNNs with the same number of hidden units  
250 ( $H = 50$ ). To understand whether the network’s size influences the types of representations learned, we  
251 next trained Value RNNs with a variable number of hidden units. We found that Value RNNs with as few  
252 as 2 hidden units could learn the value function, as evidenced by their RPEs matching those of the Belief  
253 model (Fig 6A). In other words, despite there being 25 discrete states in our implementation of this task  
254 (and, as such, beliefs were 25-dimensional), an RNN with a 2-dimensional representation was sufficient for

255 performing the task. On the other hand, RNNs with fewer units had representations that were notably less  
256 belief-like, in terms of how well they linearly encoded beliefs (Fig 6B) and allowed for decoding the true  
257 state (Fig 6C). Thus, Value RNNs with 2 or more hidden units could all estimate value equally well, but  
258 only those with a sufficient number of hidden units featured representations that resembled beliefs.

## 259 **Generalization to other tasks**

260 We showed that RNNs could be trained to estimate value in the tasks from Starkweather et al. [7], and that  
261 the representations of these RNNs became more belief-like as a result of training. We next assessed whether  
262 the same basic insights generalized to a different task, that of Babayan et al. [10]. In this task, similar to  
263 Task 1 of Starkweather et al. [7], each trial consisted of an odor followed by a deterministic reward. Unlike  
264 in the Starkweather task, in this task the reward quantity on each trial was varied in blocks. In Block 1, each  
265 trial consisted of a small ( $1 \mu\text{L}$ ) reward, while in Block 2 each trial consisted of a large ( $10 \mu\text{L}$ ) reward. As  
266 a result, we formalize the states in this task using pairs of ITI and ISI states, one for each block (Fig 7A).  
267 Importantly, the block identity was hidden to the animal, and was resampled uniformly every five trials. This  
268 meant that animals had to use the reward observations to infer which block they were currently in.

269 Previous work showed that the dopamine activity of animals trained on this task depended on the num-  
270 ber of trials in the current block (Fig 7C), similar to what you would expect if animals used a belief rep-  
271 resentation (Fig 7D, dashed lines) [10]. To see if the Value RNN could reproduce these results, we trained  
272  $N = 12$  Value RNNs on this task. We found that Value RNNs exhibited nearly identical RPEs as the Belief  
273 model (Fig 7D). This was even true on probe sessions that included blocks with intermediate reward sizes,  
274 a setting in which both dopamine activity and belief RPEs exhibited a characteristic nonlinear relationship  
275 with reward size (Fig S2). These results indicate that the Value RNNs found a representation sufficient for  
276 estimating value despite the hidden states.

277 We next asked whether, as in the Starkweather task, the Value RNN's representations resembled beliefs.  
278 To do this, we repeated the analyses in Fig 4. We found that the Value RNN's activity could be linearly  
279 transformed to match the beliefs (Fig 7D), and that its activity could also be used to decode the hidden  
280 states in the task (Fig 7E), as compared to RNNs not trained on the task. We next took a dynamical systems

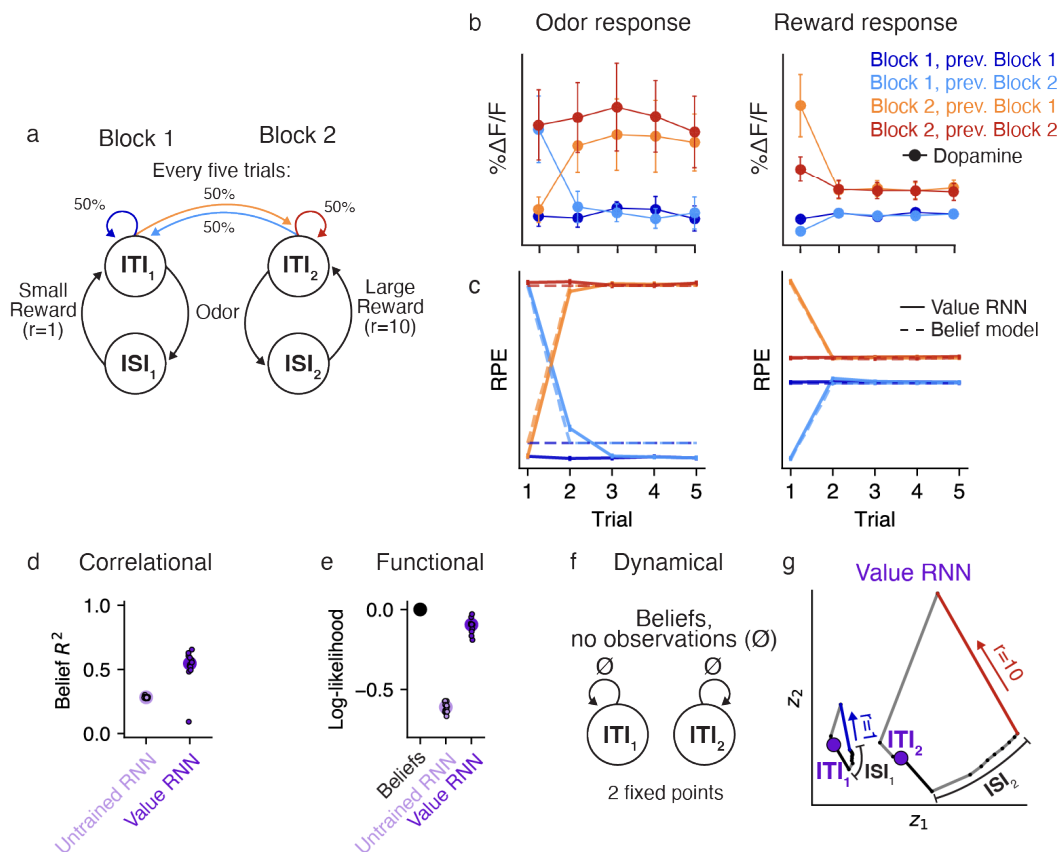

**Fig 7. Value RNNs trained on Babayan et al. [10] reproduce Belief RPEs and learn belief-like representations.** **a.** Task environment of Babayan et al. [10]. Each trial consists of an odor and a subsequent reward. The reward amount depends on the block identity, which is resampled uniformly every five trials (green). **b.** Average phasic dopamine activity in the VTA of mice trained on the task at the time of odor (left) and reward (right) delivery. Activity is shown separately as a function of the trial index within the block (x-axis) and the current/previous block identity (colors). Reproduced from Babayan et al. [10]. **c.** Average RPEs of the Belief model (dashed lines) and an example Value RNN (solid lines). Same conventions as panel **b**. **d.** Total variance of beliefs explained ( $R^2$ ) using a linear transformation of model activity. Same conventions as Fig 4B. **e.** Cross-validated log-likelihood of linear decoders trained to estimate true states using RNN activity. Same conventions as Fig 4C. **f.** Dynamics of beliefs in the absence of observations. Same conventions as Fig 5A. **g.** Trajectories of an example Value RNN's activity, in the 2D subspace identified using PCA, during an example trial from Block 1 (left) and Block 2 (right). These two dimensions explained 69% of the total variance in the Value RNN's activity across trials. Putative ITI states indicated as purple circles. Same conventions as Fig 5B.

281 approach, characterizing the fixed points of beliefs in this task. Similar to Task 1 of Starkweather et al. [7]  
282 (Fig 5A), beliefs in the present task should have a fixed point at the ITIs for Block 1 and Block 2 (Fig 7F).  
283 To assess whether this was the case in the Value RNN, we visualized an example RNN's activity on the last  
284 few trials of each block, when the network should be confident as to the current block's identity (given the  
285 reward observations on previous trials). During these trials, we observed two non-overlapping trajectories of  
286 activity for each block (Fig 7G). Following a reward observation, the RNN's activity converged to a distinct  
287 location in state space corresponding to that block's ITI. This suggested the RNN had two fixed points, as  
288 in the belief representation. In reality, these were not both truly fixed points, as the RNN's activity did  
289 eventually return to a single fixed point given enough time without an observation (Fig S3A). However, the  
290 RNN's two putative ITI states remained distinct across the range of ITI durations present in the training  
291 data (Fig S3B), allowing the network to keep these trajectories (and thus the states corresponding to each  
292 block) separate. These analyses suggest that Value RNNs trained on this task also exhibited belief-like  
293 representations.

#### 294 **Untrained RNNs could also be used to estimate value and encode beliefs**

295 In the sections above we analyzed Value RNNs whose representations had been trained through TD learning.  
296 Here we take an alternative approach, inspired by reservoir computing, and consider the representations of  
297 untrained RNNs. In reservoir computing, a static dynamical system, or "reservoir," is combined with a  
298 learned linear readout. Given an appropriately initialized reservoir (e.g., an RNN), this approach can be  
299 used to approximate any nonlinear function [28]. Inspired by this approach, we explored whether we could  
300 choose a random initialization of our RNNs such that it was only necessary to learn a linear weighting of  
301 the RNN's representation to form its value estimate (i.e.,  $\phi$  in Eqn. (11) was fixed throughout training).  
302 Because this model resembles an echo state network ("ESN"; a reservoir computer whose reservoir is an  
303 RNN [29]), we will refer to this model as a Value ESN.

304 We initialized each RNN by sampling the matrix of recurrent weights as a random orthogonal matrix  
305 scaled by a single gain parameter [30], an approach commonly used to initialize RNNs (see Materials and  
306 Methods). The gain effectively modulated the duration of the network's transient response to inputs (Fig

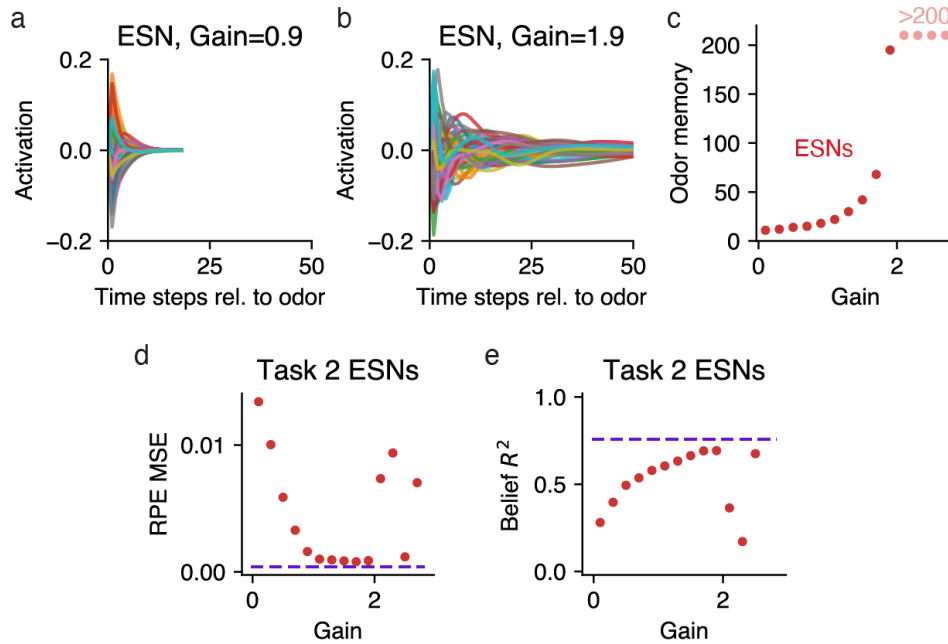

**Fig 8. Untrained RNNs can also be used to estimate value.** **a.** Time-varying activations of 20 example units in response to an odor input, in an untrained RNN (“ESN”) with 50 units, initialized with a gain of 0.1. **b.** Same as panel **a**, but for an initialization gain of 1.9, and a wider range shown on the x-axis. **c.** Number of time steps it took each ESN’s activity to return to its fixed point following an odor observation (“odor memory”; see Materials and Methods), as a function of ESN initialization gain. Points labeled “>200” indicate those that did not fit within the plot. **d.** RPE MSE (see Fig 3D) as a function of ESN initialization gain, after training each ESN’s value weights to estimate value during Task 2. Dashed line indicates average levels of a Task 2 Value RNN with the same number of units. **e.** Belief  $R^2$  (see Fig 4B) as a function of ESN initialization gain. Same conventions as panel **d**.

307 8A-B), such that larger gains led to larger odor memories (Fig 8C). In agreement with previous work, we  
308 found that when the gain was above a critical value (“the edge of chaos” [30]), the network’s activity never  
309 decayed back to baseline (e.g., gain > 2 in Fig 8C).

310 To see if Value ESNs could be trained to estimate value, we trained Value ESNs on Starkweather Task  
311 2, varying the gain for each network. During training, only the network’s value weights were modified to  
312 estimate the value function. We found that for a range of different gains, the resulting Value ESN could  
313 estimate value nearly as well as Value RNNs, and recapitulate the experimentally observed dopamine pat-  
314 terns (Fig 8D). Interestingly, the Value ESN’s representations could even be linearly transformed to match  
315 beliefs (Fig 8E). We emphasize that the Value ESN’s representation was determined solely by its initial-  
316 ization; given an appropriate initialization, the Value ESN’s representation could effectively act as a set of  
317 temporal basis functions, allowing the network to match any downstream target, including beliefs. However,  
318 in terms of dynamics, the Value ESN’s dynamics differed substantially from those of the beliefs: For the  
319 best performing Value ESN (with a gain of 1.9), following an odor observation, the RNN’s activity returned  
320 to its fixed point after around 200 time steps (Fig 8C), whereas Task 2 beliefs return to the ITI point in 15  
321 time steps. These results show that allowing the RNN to modify its representation during training led to its  
322 representation becoming even more belief-like than expected from a more carefully initialized RNN.

## 323 Discussion

324 We have shown that training RNNs to estimate value in partially observable environments yields representa-  
325 tions that resemble beliefs. Specifically, we showed that, after training, the RNN activity i) could be linearly  
326 transformed to approximate beliefs, ii) could be used to decode the true state in the environment, and iii)  
327 had a dynamical structure consistent with beliefs.

328 From a theoretical perspective, using an RNN resolves the problem of how to compute belief states, by  
329 replacing the fine-tuned Bayesian machinery needed for beliefs with a more general learned function approx-  
330 imator (e.g., a recurrent neural network). Our results illustrate that, to perform tasks in partially observable  
331 environments, it is not necessary for an agent or animal to explicitly estimate states using a belief representa-  
332 tion; rather, agents can learn a sufficient representation for solving the task from observations alone. This is

333 promising from a normative perspective, as it shows how neural circuits might come to compute theoretical  
334 features such as beliefs without that objective needing to be explicitly learned. Moreover, there is a growing  
335 toolkit for reverse engineering RNN solutions [26, 27, 31], which can shed light on learned mechanisms of  
336 value computation.

337 One potential benefit of the Value RNN over the Belief model for estimating value is the ability to sepa-  
338 rate the capacity of the model (i.e., the number of hidden units in the RNN) from the size of the state space  
339 in the environment. As we showed in Fig 6, Value RNNs with fewer units discovered a representation that  
340 was more compressed than beliefs, but nevertheless sufficient for performing the task at hand. Value RNNs  
341 with more units had more belief-like representations. This suggests a potentially useful trade-off, in which  
342 agents could choose to allocate more capacity to a task in exchange for more belief-like representations.  
343 Such a trade-off may be a relevant feature for biological organisms, who must be able to perform tasks such  
344 as value estimation in complex environments where it may not always be feasible to learn the full belief  
345 representation.

346 From a methodological perspective, this work can serve as a blueprint for how to bridge analyses of neu-  
347 ral computation across levels of abstraction. In future work, we hope to apply this framework to test neural  
348 models of how animals perform associative learning via reinforcement learning. For instance, previous work  
349 has suggested that prefrontal cortex may perform state estimation in tasks with hidden states [6, 12, 7, 13].  
350 The same tools we apply here to artificial neural networks can also be applied to neural activity recorded  
351 from animals performing the same task. For instance, if cortex implements something like a Value RNN,  
352 cortical activity may show a longer transient response to odors during Task 1 than in Task 2 (Fig 5). On the  
353 other hand, if activity is more like a Value ESN, cortical representations should be largely the same in both  
354 tasks.

355 Traditional models of how animals perform trace conditioning tasks like the ones we consider here make  
356 a variety of implicit assumptions about how animals represent the passage of time [32, 33]. For example, the  
357 state space shown in Fig 2A, which forms the basis of the belief representation, conceptualizes the passage  
358 of time in the form of microstates. Many modeling efforts require even more assumptions to account for  
359 scalar variability in animals' estimates of elapsed time, such as by incorporating a more complex set of  
360 temporal basis functions. In our model, by contrast, the Value RNN's time-varying representation of inputs

361 is learned through training. We observed that individual units in our RNNs were tuned to elapsed time  
362 relative to observations, and that the temporal precision of tuning decreased with elapsed time (Fig S1),  
363 both of which are standard assumptions of microstate representations [34]. Similarly tuned “time cells” have  
364 been observed in the striatum [35], hippocampus [36], and prefrontal cortex [37]. Our modeling suggests  
365 that at least some assumptions about microstate representations may be redundant in the sense that they may  
366 emerge naturally in recurrent networks that are trained to perform reinforcement learning. This viewpoint  
367 resonates with the idea (reviewed in [38]) that delay encoding can arise as an emergent property of neural  
368 network dynamics.

369 Previous work has shown that, in animals, prefrontal cortex activity is a necessary component of ani-  
370 mals’ state representations [13]. This work found that inactivating prefrontal cortex in the Starkweather task  
371 led to animals’ RPEs in Task 2 resembling the RPEs of Task 1. This is what one would expect if prefrontal  
372 cortex was involved in estimating a belief in omission trials. In fact, both Tasks 1 and 2 include another form  
373 of uncertainty, which is the reward time on each trial. The fact that prefrontal inactivation did *not* interact  
374 with animals’ estimates of timing suggests that different neural circuits may form belief-like representations  
375 specific to particular types of state uncertainty (e.g., temporal uncertainty versus reward uncertainty). In the  
376 present work, our RNNs should be thought of as a generic computational model, and not a model of individ-  
377 ual brain regions. These networks had a generic architecture and only a single layer; as a result, our model  
378 would be unable to distinguish between different sources of uncertainty. Nevertheless, it is an interesting  
379 question how architectural considerations, such as layer connectivity and the dominance of feedforward  
380 versus recurrent connectivity, might contribute to where in the brain different belief-like representations are  
381 formed.

382 Here we have shown that computing beliefs explicitly is not a necessary precursor for optimally per-  
383 forming a task in partially observable environments. Nor is it required to reproduce experimentally observed  
384 patterns of dopamine neuron activity. Nevertheless, beliefs are an efficient representation in that they are  
385 sufficient for solving *any* task in the same environment. Thus, beliefs may be a desirable representation  
386 for animals, who may need to achieve a range of different goals in the same environment (e.g., finding wa-  
387 ter when thirsty, but finding food when hungry) without having to learn a representation in each of these  
388 tasks separately. Future work should explore whether a dedicated belief mechanism is necessary in these



389 multi-task settings, or if the RNN framework we present here can also yield representations that effectively  
390 generalize to new tasks in the same environment.

## 391 **Materials and Methods**

### 392 **Task implementation**

393 In each experiment, at each time step  $t$ , agents received two observations: an odor cue,  $c_t \in \{0, 1\}$ ; and a  
394 reward,  $r_t \in \{0, r\}$ , where  $r > 0$  depended on the task (see below). We will refer to the total observation  
395 vector as  $\mathbf{o}_t = [c_t \ r_t]$ . We treated each time step as equal to 200ms.

396 Each trial began with an intertrial interval (ITI),  $t_{ITI} \in \mathbb{N}$ , during which there were no observations  
397 ( $\mathbf{o}_t = 0$  for  $t < t_{ITI}$ ). The ITI (offset by a minimum delay of 10 time steps) was sampled as  $t_{ITI} - 10 \sim$   
398  $\text{Geom}(p_{ITI} = \frac{1}{8})$ , where  $\text{Geom}(p)$  is a geometric distribution with parameter  $p$ .

399 Following the ITI, a single odor cue was presented as  $c_t = 1$  for  $t = t_{ITI}$ . The cue was then followed  
400 by another interval with no observations, called the interstimulus interval (ISI),  $t_{ISI} \in \mathbb{N}$ . A reward was  
401 then presented as  $r_t > 0$  for  $t = t_{ITI} + t_{ISI}$ , after which point the trial terminated. The details of the ISI  
402 and reward size depended on the specific task, as described below.

### 403 **Starkweather tasks**

404 There were two versions of this task. In both Tasks 1 and 2, every non-zero reward size had  $r_t = 1$ . In  
405 Task 2, with probability  $p_{omission} = 0.1$ , the reward on a given trial was omitted, such that  $r_t = 0$  for the  
406 duration of the trial. In both tasks, the ISIs on each trial were sampled from a discretized Gaussian with  
407 mean  $\mu = 10$ , standard deviation  $\sigma = 2.5$ , and range  $6 \leq t_{ISI} \leq 14$ , as in Starkweather et al. [7].

### 408 **Babayan task**

409 In this task, non-zero reward sizes were determined in blocks of trials. In block 1, the non-zero reward size  
410 was  $r_t = 1$ , while in block 2 the non-zero reward size was  $r_t = 10$ . Each block consisted of 5 sequential  
411 trials. Block identities were sampled uniformly with equal probability. On all trials, the ISIs were uniformly

412 sampled as  $t_{ISI} \sim \text{Unif}(\{9, 10, 11\})$ . For Fig S2, sessions also included blocks of intermediate rewards:  
413  $r_t \in \{1, 2, 4, 6, 8, 10\}$ , where block identities were sampled in similar proportions to those used in Babayan  
414 et al. [10] (i.e., blocks with  $r_t = 1$  or  $r_t = 10$  comprised  $\sim 90\%$  of the total trials).

## 415 Recurrent neural network implementation

416 We trained recurrent network models, in PyTorch, on multiple tasks to estimate value. Each *Value RNN*  
417 consisted of a GRU cell [24] with  $H \in \mathbb{N}$  units, followed by a linear readout of value. At each time step  $t$ ,  
418 the RNN received observations,  $\mathbf{o}_t \in \mathbb{R}^2$ , from a given experiment. The RNN’s representation can be written  
419 as  $\mathbf{z}_t = f_\phi(\mathbf{o}_t, \mathbf{z}_{t-1})$  given parameters  $\phi$ . The RNN’s output was the value estimate  $\widehat{V}_t = \mathbf{w}^\top \mathbf{z}_t + w_0$ ,  
420 for  $\mathbf{w} \in \mathbb{R}^H$  and  $w_0 \in \mathbb{R}$ . The full parameter vector  $\theta = [\phi \ \mathbf{w} \ w_0]$  was learned using TD learning. This  
421 involved backpropagating the gradient of the squared error loss  $\delta_t^2 = (r_t + \gamma \widehat{V}_{t+1} - \widehat{V}_t)^2$  with respect to  $\widehat{V}_t$   
422 on episodes composed of 20 (Starkweather task) or 50 (Babayan task) concatenated trials. Unless otherwise  
423 noted we used  $\gamma = 0.93$  as in Starkweather et al. [13].

424 For each task, and for each  $H \in \{2, 5, 10, 20, 50, 100\}$  units, we trained  $N = 12$  networks. Prior to  
425 training each network, the weights and biases of the GRU (i.e.,  $\phi$ ) were initialized using PyTorch’s default  
426 of  $\mathcal{U}(-a, a)$  where  $a = \frac{1}{\sqrt{H}}$ . Training then proceeded for a maximum of 150 epochs on a session of 10,000  
427 trials, with a batch size of 12 episodes. Training was stopped early if the loss increased for 4 consecutive  
428 epochs. Gradient updates used Adam with an initial learning rate of 0.003. No hyperparameter search was  
429 performed to fine-tune these choices. In the text, we refer to *Value RNNs* as the result of this training process,  
430 while *Untrained RNNs* are those that have been similarly initialized but not trained.

431 The *Value ESN* was similar to a Value RNN, except that it was initialized differently, and  $\phi$  was frozen  
432 during training (i.e., the only learned parameters were  $\mathbf{w}$  and  $w_0$ ). For initialization, we did the follow-  
433 ing (“Tensorflow-style” initialization). All of the GRU’s biases were initialized to zero. The GRU’s re-  
434 current weights were sampled as a random orthogonal matrix using `torch.nn.init.orthogonal_`  
435 with a given gain [30]. The GRU’s input weights were sampled as  $\mathcal{U}(-a, a)$  where  $a = \sqrt{\frac{6}{2+H}}$ , using  
436 `torch.nn.init.xavier_uniform_` [39].

## 437 State and belief representations

Given a task with hidden states  $s \in \{1, \dots, K\}$ , the belief,  $\mathbf{b}_t \in [0, 1]^K$ , is the posterior probability distribution over each possible state [17]. The tasks we analyze here are technically discrete-time semi-Markov processes, and so we follow previous work in formulating them equivalently as Markov processes with micro-states defined over each relevant discrete time step [6, 7]. In this setting, observations occur at the transition between states. As a result, the belief in state can be written as:

$$b_t(k) \propto \sum_{k'=1}^K O_{o_t}(k', k) T(k', k) b_{t-1}(k') \quad (12)$$

438 where  $T \in [0, 1]^{K \times K}$  is the matrix of transition probabilities, and  $O_o(k', k)$  is the probability of observing  
 439  $o$  after making a transition from  $k$  to  $k'$ .

## 440 Starkweather tasks

441 In both Tasks 1 and 2 there are three distinct observations,  $\mathbf{o}_t \in \{[0 \ 0], [1 \ 0], [0 \ x]\}$ , which we refer to as  
 442 the null, odor, and reward observations, respectively. Let the possible reward times be  $t_{ISIS} = \{6, \dots, 14\}$ .  
 443 The maximum reward time is  $\max(t_{ISIS}) = 14$ , and so we let states 1 – 14 be the ISI microstates. The  
 444 ITI is a Geometric distribution plus a minimum ITI of  $t_{ITI} = 10$ , and so we let states 15 – 25 be the ITI  
 445 microstates. There are  $K = 25$  total states.

446 We first define the observation probabilities,  $O_{null}, O_{odor}, O_{reward} \in \{0, 1\}^{K \times K}$ , where  $O_o(k', k)$  indi-  
 447 cates the probability of having transitioned from state  $k$  to state  $k'$  upon observing  $o \in \{null, odor, reward\}$ .  
 448 Each  $O_o(k', k) = 0$  except at the following:

- 449 •  $O_{null}(t+1, t) = 1$  for all  $t \neq \max(t_{ISIS})$
- 450 •  $O_{null}(K, K) = 1$
- 451 •  $O_{odor}(t, K) = 1$  for  $t = 1$  (Task 1) or  $t \in \{1, \max(t_{ISIS}) + 1\}$  (Task 2)
- 452 •  $O_{reward}(\max(t_{ISIS}) + 1, t) = 1$  for  $t \in t_{ISIS}$

453 To define the transition probabilities, let  $p_t \in [0, 1]$  be the probability of receiving reward at time  $t \in t_{ISI}$ ,  
 454  $F_t = \sum_{t' \leq t} p_{t'}$  the cumulative probability, and  $h_t = p_t / (1 - F_t)$  the hazard. Recall that  $p_{ITI} = \frac{1}{8}$ . Then  
 455  $T(k', k) = 0$  except at the following:

- 456 •  $T(t + 1, t) = 1$  for  $t \notin \max(t_{ISI})$
- 457 •  $T(t + 1, t) = 1 - h_t$  and  $T(\max(t_{ISI}) + 1, t) = h_t$  for  $t \in t_{ISI}$
- 458 •  $T(K, K) = 1 - p_{ITI}$
- 459 •  $T(\max(t_{ISI}) + 1, K) = p_{ITI} p_{omission}$
- 460 •  $T(1, K) = p_{ITI}(1 - p_{omission})$

#### 461 **Babayan task**

The states in this task can be thought of as two copies of the beliefs in the Starkweather tasks, with one copy for each of the two blocks. (Note that  $t_{ISI} = \{9, 10, 11\}$ ,  $K = 22$ , and the hazard probabilities must be modified from the Starkweather task to account for the different reward timing distribution.) Each copy has 11 ISI microstates (because the maximum reward time is  $\max(t_{ISI}) = 11$ ) and 11 ITI microstates. Let  $\mathbf{b}_t^{(1)} \in [0, 1]^{22}$  and  $\mathbf{b}_t^{(2)} \in [0, 1]^{22}$  be the beliefs for the substates of block 1 and block 2, respectively. Then the full belief  $\mathbf{b}_t \in [0, 1]^{44}$  is as follows:

$$\mathbf{b}_t = [p_t \mathbf{b}_t^{(1)} \ (1 - p_t) \mathbf{b}_t^{(2)}] \tag{13}$$

$$p_t = f(r_t) \text{ if } r_t > 0 \text{ otherwise } p_{t-1}$$

462 where  $p_t \in [0, 1]$  is the estimated probability of being in block 1, and  $f$  is our likelihood function mapping  
 463 nonzero rewards,  $r_t$ , to the estimated probability of being in block 1 vs. block 2. In other words, we modeled  
 464 the belief in the block identity as being a function only of the most recently observed reward. We defined  $f$   
 465 following the original paper: Let  $\phi(r_t; \mu, \sigma)$  be the pdf of a Normal distribution with mean  $\mu$  and standard  
 466 deviation  $\sigma_r > 0$ . Then  $f(r_t) = \frac{\phi(r_t; \mu_1, \sigma_r)}{\phi(r_t; \mu_1, \sigma_r) + \phi(r_t; \mu_2, \sigma_r)}$ , where  $\mu_1 = 1$  and  $\mu_2 = 10$  are the rewards amounts  
 467 in block 1 and 2, respectively. Here we assumed  $\sigma_r$  was arbitrarily small, so we used  $\sigma_r = 0.001$ .

## 468 **Model analyses**

469 We analyzed exemplars from each model class (Beliefs, Value RNNs, Untrained RNNs, Value ESNs) using  
470 two sessions of 1,000 concatenated trials each, using the same task parameters as those used when training  
471 the RNNs (see above). The first session was used for fitting any parameters relevant to the analysis (i.e.,  
472 value weights, regression weights, decoding weights), while the second session was used for evaluation.  
473 Because the RNN's responses were deterministic functions of their inputs, prior to analysis we added noise  
474 to all RNN representations to prevent overfitting during regression and decoding as follows. Let  $\sigma_i > 0$   
475 be the sample standard deviation of the activity of hidden unit  $i$  across trials. Then we added zero-mean  
476 Gaussian noise with a standard deviation of  $0.01\sigma_i$  to this unit's activity, so that each unit had the same  
477 SNR:  $10 \log_{10}(\sigma_i^2/(\sigma_i^2 0.01^2)) = 40$  dB.

## 478 **Value estimates**

479 Each model's value estimate was given by  $\hat{V}_t = \mathbf{z}_t^\top \hat{\mathbf{w}} + w_0$ , where  $\hat{\mathbf{w}} \in \mathbb{R}^D$  and  $w_0 \in \mathbb{R}$  are the value  
480 weights, and  $\mathbf{z}_t \in \mathbb{R}^D$  is the model's representation at time  $t$ . (For the belief model,  $\mathbf{z}_t = \mathbf{b}_t$ .)

481 We estimated the value weights,  $\hat{\mathbf{w}}$ , using Least-Squares TD (LSTD) [22]:  $\hat{\mathbf{w}} = \hat{D}^{-1} \hat{\mathbf{d}}$ , where  $\hat{D} =$   
482  $\sum_{t=1}^{T-1} \mathbf{z}_t (\mathbf{z}_t - \gamma \mathbf{z}_{t+1})^\top$  and  $\hat{\mathbf{d}} = \sum_{t=1}^{T-1} r_t \mathbf{z}_t$ . To ensure each model's value function was estimated using  
483 the same procedure, we used LSTD even for the models including RNNs, even though the Value RNNs and  
484 Value ESNs learned their own value weights during training.

## 485 **Reward prediction errors**

486 To assess how close each RNN's RPEs came to the RPEs found using the belief model, we defined an RNN's  
487 RPE error using the mean squared error:  $\frac{1}{T} \sum_{t=1}^T (\delta_t - \hat{\delta}_t)^2$ , where  $\hat{\delta}_t$  is the RNN's RPE, and  $\delta_t$  is the RPE  
488 from the belief model. Because each trial had at most one reward delivery, for simplicity we considered the  
489 RPEs only at the time of reward delivery on each trial (i.e., the  $t$  in the above equation refers to a trial and  
490 not a time step); this simplification did not affect our results.

## 491 **Belief $R^2$**

To assess how much variance of the beliefs could be explained by each model's learned representation, we used multivariate linear regression:

$$\widehat{W} = (Z^\top Z)^{-1} Z^\top B \quad (14)$$

492 where  $Z \in \mathbb{R}^{T \times (H+1)}$  is the matrix whose  $t^{\text{th}}$  row is  $[z_t \ 1]$ ,  $B \in \mathbb{R}^{T \times K}$  is the matrix whose  $t^{\text{th}}$  row is  $b_t$ ,  
493 and  $\widehat{W} \in \mathbb{R}^{(H+1) \times K}$ .

To evaluate model fit, let  $\text{Var}(X) = \frac{1}{T} \sum_{t=1}^T \|\mathbf{x}_t - \bar{\mathbf{x}}\|_2^2$ , where  $\mathbf{x}_t$  is the  $t^{\text{th}}$  row of  $X$ , and  $\bar{\mathbf{x}}$  is the mean of the rows of  $X$ . Then we calculated the total variance explained:

$$R^2 = 1 - \frac{\text{Var}(B - Z\widehat{W})}{\text{Var}(B)} \quad (15)$$

## 494 **State decoding**

495 We asked where we could find a decoder that could infer the underlying state,  $s_t \in \{1, \dots, K\}$ , using an  
496 affine transformation of the RNN's representation,  $z_t \in \mathbb{R}^H$ . To find such a decoder, we first standardized  
497 each model representation (considering each dimension of  $z_t$  in isolation) to have zero mean and unit vari-  
498 ance. We then performed a multinomial logistic regression using scikit-learn's  
499 `linear_model.LogisticRegression` with the parameters `multi_class="multinomial"`,  
500 `C=1`, and `max_iter=1e4`.

After training, the decoder's estimated state probabilities over  $s_t$  are:

$$\boldsymbol{\pi}_t = \text{softmax}(\tilde{z}_t^\top \widehat{W}) \in [0, 1]^K \quad (16)$$

501 where  $\widehat{W} \in \mathbb{R}^{(H+1) \times K}$  contains the decoder parameters;  $\tilde{z}_t \in \mathbb{R}^{H+1}$  is the model representation at time  
502  $t$  after standardization, plus an extra constant column of 1's to fit the offset; and the softmax function  
503 normalizes the vector to be a valid probability over the  $K$  values of  $s_t$ .

To evaluate the resulting decoder, we calculated the model's log-likelihood ( $\ell$ ) on the evaluation session

as follows:

$$\ell(\widehat{W} \mid s_1, \dots, s_T, \tilde{z}_1, \dots, \tilde{z}_T) = \frac{1}{T} \sum_{t=1}^T \log(\pi_t(s_t)) \quad (17)$$

504 where  $\pi_t(s_t) \in [0, 1]$  is the  $s_t^{\text{th}}$  entry of the vector  $\pi_t$ . We calculated the log-likelihood for the belief  
505 model similarly, except instead of training a decoder we used  $\pi_t = \mathbf{b}_t$ . For the Babayan task (Fig 5E),  
506 we calculated the log-likelihood on all trials except the first trial in each block. This was necessary for the  
507 beliefs to act as an upper-bound on the log-likelihood, because we defined the beliefs in a way that did not  
508 assume knowledge of the number of trials in each block.

## 509 Dynamics analysis

510 An RNN with parameters  $\phi$  has a hidden state that evolves as  $\mathbf{z}_t = f_\phi(\mathbf{o}_t, \mathbf{z}_{t-1})$ . Conditioned on a particular  
511 constant input,  $\mathbf{o}$ , an RNN is at a *fixed point* when  $\|f_\phi(\mathbf{o}, \mathbf{z}) - \mathbf{z}\|_2^2 \approx 0$ . Numerically, we can simply look  
512 for  $\mathbf{z}$  where  $\|f_\phi(\mathbf{o}, \mathbf{z}) - \mathbf{z}\|_2^2 < \epsilon$ . For our analyses below we chose  $\epsilon = 1 \times 10^{-5}$ .

513 *Identifying fixed points (Fig 5B, Fig 7G).* During training, RNNs received three distinct types of inputs,  
514  $\mathbf{o}_t \in \{[0 \ 0], [1 \ 0], [0 \ r]\}$ , which we refer to as the null ( $\emptyset$ ), odor, and reward inputs, respectively. Under the  
515 beliefs of the Starkweather and Babayan tasks, the odor and reward inputs always result in a change in the  
516 beliefs. As a result, any fixed points of the beliefs must be conditional on the null input,  $\emptyset$ . We therefore  
517 sought to identify an RNN's fixed points conditional on a null input. To do this, we took a numerical ap-  
518 proach: We initialized the RNN to a random state, applied the null input until the RNN's activity converged,  
519 and then repeated this process across different random states to get a candidate set of fixed points. More pre-  
520 cisely, we considered  $N = 20$  randomly selected values of  $\mathbf{z}$  in the testing data following an odor or reward  
521 observation as a set of starting seeds. For each starting seed,  $\mathbf{z}_0$ , we computed the RNN's representation,  $\mathbf{z}_t$ ,  
522 over time, given no further odor or reward observations:  $\mathbf{z}_t = f_\phi(\emptyset, \mathbf{z}_{t-1})$ . We repeated this process until  
523  $\eta_t = \|\mathbf{z}_t - \mathbf{z}_{t-1}\|_2^2 < \epsilon$ . We then added  $\mathbf{z}_t$  to our list of candidate fixed points,  $\mathcal{F}$ . For each pair of candidate  
524 fixed points within a distance  $1 \times 10^{-3}$  of each other, we considered these to be the same fixed point.

525 *Odor and reward memory duration (Fig 5C, Fig 5D).* For each Value RNN with a single fixed point,  
526 we measured the network's odor (or reward) memory as follows. We initialized each RNN to its fixed

527 point,  $z_0$ , and then provided an odor (or reward) observation at time  $t = 1$ . We then measured the RNN's  
528 representation,  $z_t$ , over time, given no further odor or reward observations:  $z_t = f_\phi(\emptyset, z_{t-1})$ , for  $t > 1$ .  
529 For each  $t$ , we calculated the distance of the activity from its fixed point:  $\eta_t = \|z_t - z_0\|_2^2$  (Fig 5C). We  
530 repeated this until  $\eta_t$  converged to zero, defining the *odor memory* (or *reward memory*) as the  $t$  at which  
531  $\eta_t < 1 \times 10^{-3}$  (Fig 5D).

## 532 **Data Availability Statement**

533 All data and code used for analysis and plotting is available on a GitHub repository at [https://github.](https://github.com/mobeets/value-rnn-beliefs/)  
534 [com/mobeets/value-rnn-beliefs/](https://github.com/mobeets/value-rnn-beliefs/)

## 535 **Author Contributions**

536 **Conceptualization:** Jay A. Hennig, Sandra A. Romero Pinto, Takahiro Yamaguchi, Naoshige Uchida,  
537 Samuel J. Gershman

538 **Formal analysis:** Jay A. Hennig

539 **Investigation:** Jay A. Hennig

540 **Funding acquisition:** Samuel J. Gershman, Naoshige Uchida, Scott W. Linderman

541 **Methodology:** Jay A. Hennig, Samuel J. Gershman

542 **Supervision:** Scott W. Linderman, Naoshige Uchida, Samuel J. Gershman

543 **Visualization:** Jay A. Hennig

544 **Writing - original draft:** Jay A. Hennig

545 **Writing - review & editing:** Jay A. Hennig, Sandra A. Romero Pinto, Takahiro Yamaguchi, Scott W.  
546 Linderman, Naoshige Uchida, Samuel J. Gershman



## 547 **Acknowledgments**

548 This work was funded by NIH U19 NS113201-01 and Air Force Office of Scientific Research grant FA9550-  
549 20-1-0413.

## **References**

- [1] Wolfram Schultz, Peter Dayan, and P Read Montague. A neural substrate of prediction and reward. *Science*, 275:1593–1599, 1997.
- [2] Hannah M Bayer and Paul W Glimcher. Midbrain dopamine neurons encode a quantitative reward prediction error signal. *Neuron*, 47(1):129–141, 2005.
- [3] Jeremiah Y Cohen, Sebastian Haesler, Linh Vong, Bradford B Lowell, and Naoshige Uchida. Neuron-type-specific signals for reward and punishment in the ventral tegmental area. *nature*, 482(7383):85–88, 2012.
- [4] Neir Eshel, Michael Bukwich, Vinod Rao, Vivian Hemmelder, Ju Tian, and Naoshige Uchida. Arithmetic and local circuitry underlying dopamine prediction errors. *Nature*, 525(7568):243–246, 2015.
- [5] Leslie Pack Kaelbling, Michael L Littman, and Anthony R Cassandra. Planning and acting in partially observable stochastic domains. *Artificial intelligence*, 101(1-2):99–134, 1998.
- [6] Nathaniel D Daw, Aaron C Courville, and David S Touretzky. Representation and timing in theories of the dopamine system. *Neural computation*, 18(7):1637–1677, 2006.
- [7] Clara Kwon Starkweather, Benedicte M Babayan, Naoshige Uchida, and Samuel J Gershman. Dopamine reward prediction errors reflect hidden-state inference across time. *Nature neuroscience*, 20(4):581–589, 2017.
- [8] Armin Lak, Kensaku Nomoto, Mehdi Keramati, Masamichi Sakagami, and Adam Kepecs. Midbrain dopamine neurons signal belief in choice accuracy during a perceptual decision. *Current Biology*, 27:821–832, 2017.

- [9] Stefania Sarno, Victor de Lafuente, Ranulfo Romo, and Néstor Parga. Dopamine reward prediction error signal codes the temporal evaluation of a perceptual decision report. *Proceedings of the National Academy of Sciences*, 114:E10494–E10503, 2017.
- [10] Benedicte M Babayan, Naoshige Uchida, Samuel Gershman, et al. Belief state representation in the dopamine system. *Nature communications*, 9(1):1–10, 2018.
- [11] John G Mikhael, HyungGoo R Kim, Naoshige Uchida, and Samuel J Gershman. The role of state uncertainty in the dynamics of dopamine. *Current Biology*, 32:1077–1087, 2022.
- [12] Robert C Wilson, Yuji K Takahashi, Geoffrey Schoenbaum, and Yael Niv. Orbitofrontal cortex as a cognitive map of task space. *Neuron*, 81(2):267–279, 2014.
- [13] Clara Kwon Starkweather, Samuel J Gershman, and Naoshige Uchida. The medial prefrontal cortex shapes dopamine reward prediction errors under state uncertainty. *Neuron*, 98(3):616–629, 2018.
- [14] Samuel J Gershman and Naoshige Uchida. Believing in dopamine. *Nature Reviews Neuroscience*, 20:703–714, 2019.
- [15] Alexandre Pouget, Jeffrey M Beck, Wei Ji Ma, and Peter E Latham. Probabilistic brains: knowns and unknowns. *Nature Neuroscience*, 16(9):1170–1178, 2013.
- [16] Nathaniel D Daw, Yael Niv, and Peter Dayan. Uncertainty-based competition between prefrontal and dorsolateral striatal systems for behavioral control. *Nature Neuroscience*, 8:1704–1711, 2005.
- [17] Rajesh PN Rao. Decision making under uncertainty: a neural model based on partially observable markov decision processes. *Frontiers in computational neuroscience*, 4:146, 2010.
- [18] Pascal Poupart and Craig Boutilier. Value-directed compression of POMDPs. *Advances in Neural Information Processing Systems*, 15, 2002.
- [19] Nicholas Roy, Geoffrey Gordon, and Sebastian Thrun. Finding approximate POMDP solutions through belief compression. *Journal of Artificial Intelligence Research*, 23:1–40, 2005.

- [20] Matthew Botvinick, Jane X Wang, Will Dabney, Kevin J Miller, and Zeb Kurth-Nelson. Deep reinforcement learning and its neuroscientific implications. *Neuron*, 107(4):603–616, 2020.
- [21] Tianwei Ni, Benjamin Eysenbach, and Ruslan Salakhutdinov. Recurrent model-free RL can be a strong baseline for many POMDPs. In Kamalika Chaudhuri, Stefanie Jegelka, Le Song, Csaba Szepesvari, Gang Niu, and Sivan Sabato, editors, *Proceedings of the 39th International Conference on Machine Learning*, volume 162 of *Proceedings of Machine Learning Research*, pages 16691–16723. PMLR, 17–23 Jul 2022.
- [22] Richard S Sutton and Andrew G Barto. *Reinforcement learning: An introduction*. MIT press, 2018.
- [23] Samuel J Gershman and Nathaniel D Daw. Reinforcement learning and episodic memory in humans and animals: an integrative framework. *Annual Review of Psychology*, 68:101–128, 2017.
- [24] Kyunghyun Cho, Bart Van Merriënboer, Caglar Gulcehre, Dzmitry Bahdanau, Fethi Bougares, Holger Schwenk, and Yoshua Bengio. Learning phrase representations using rnn encoder-decoder for statistical machine translation. *arXiv preprint arXiv:1406.1078*, 2014.
- [25] David Sussillo and Omri Barak. Opening the black box: low-dimensional dynamics in high-dimensional recurrent neural networks. *Neural computation*, 25(3):626–649, 2013.
- [26] Niru Maheswaranathan, Alex Williams, Matthew Golub, Surya Ganguli, and David Sussillo. Universality and individuality in neural dynamics across large populations of recurrent networks. *Advances in neural information processing systems*, 32, 2019.
- [27] Saurabh Vyas, Matthew D Golub, David Sussillo, and Krishna V Shenoy. Computation through neural population dynamics. *Annual review of neuroscience*, 43:249–275, 2020.
- [28] Mantas Lukoševičius and Herbert Jaeger. Reservoir computing approaches to recurrent neural network training. *Computer science review*, 3(3):127–149, 2009.
- [29] Herbert Jaeger. Echo state network. *scholarpedia*, 2(9):2330, 2007.

- [30] Andrew M Saxe, James L McClelland, and Surya Ganguli. Exact solutions to the nonlinear dynamics of learning in deep linear neural networks. *arXiv preprint arXiv:1312.6120*, 2013.
- [31] Jimmy Smith, Scott Linderman, and David Sussillo. Reverse engineering recurrent neural networks with Jacobian switching linear dynamical systems. *Advances in Neural Information Processing Systems*, 34:16700–16713, 2021.
- [32] Samuel J Gershman, Ahmed A Moustafa, and Elliot A Ludvig. Time representation in reinforcement learning models of the basal ganglia. *Frontiers in computational neuroscience*, 7:194, 2014.
- [33] Vijay Mohan K Namboodiri. How do real animals account for the passage of time during associative learning? *Behavioral Neuroscience*, 2022.
- [34] Elliot A Ludvig, Richard S Sutton, and E James Kehoe. Stimulus representation and the timing of reward-prediction errors in models of the dopamine system. *Neural Computation*, 20:3034–3054, 2008.
- [35] Gustavo BM Mello, Sofia Soares, and Joseph J Paton. A scalable population code for time in the striatum. *Current Biology*, 25:1113–1122, 2015.
- [36] Christopher J MacDonald, Kyle Q Lepage, Uri T Eden, and Howard Eichenbaum. Hippocampal “time cells” bridge the gap in memory for discontinuous events. *Neuron*, 71:737–749, 2011.
- [37] Zoran Tiganj, Min Whan Jung, Jieun Kim, and Marc W Howard. Sequential firing codes for time in rodent medial prefrontal cortex. *Cerebral Cortex*, 27:5663–5671, 2017.
- [38] Joseph J Paton and Dean V Buonomano. The neural basis of timing: distributed mechanisms for diverse functions. *Neuron*, 98(4):687–705, 2018.
- [39] Xavier Glorot and Yoshua Bengio. Understanding the difficulty of training deep feedforward neural networks. In *Proceedings of the thirteenth international conference on artificial intelligence and statistics*, pages 249–256. JMLR Workshop and Conference Proceedings, 2010.

## Supplemental Figures

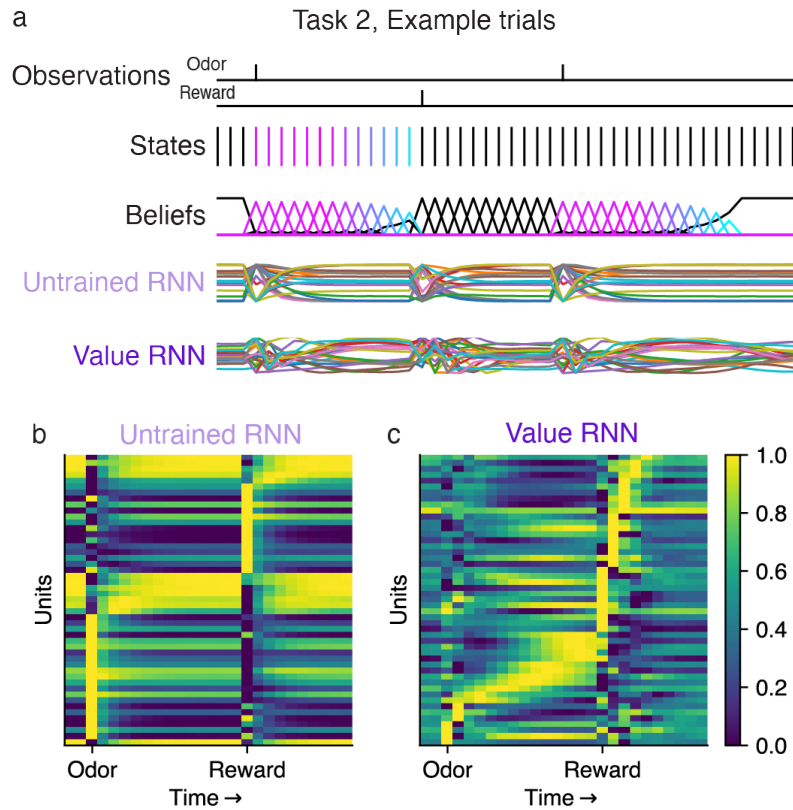

**Fig S1. RNN activity before and after training on Starkweather Task 2.** **a.** Observations, states, beliefs, and RNN activations on two example trials from Task 2. **b-c.** RNN unit activity (individually normalized to span between 0 and 1), with units sorted by time of peak activation on held-out trials, on an RNN before (panel **b**) and after (panel **c**) training. Both before and after after training, RNN units exhibited tuning to elapsed time following observations, with variance that scaled with elapsed time.

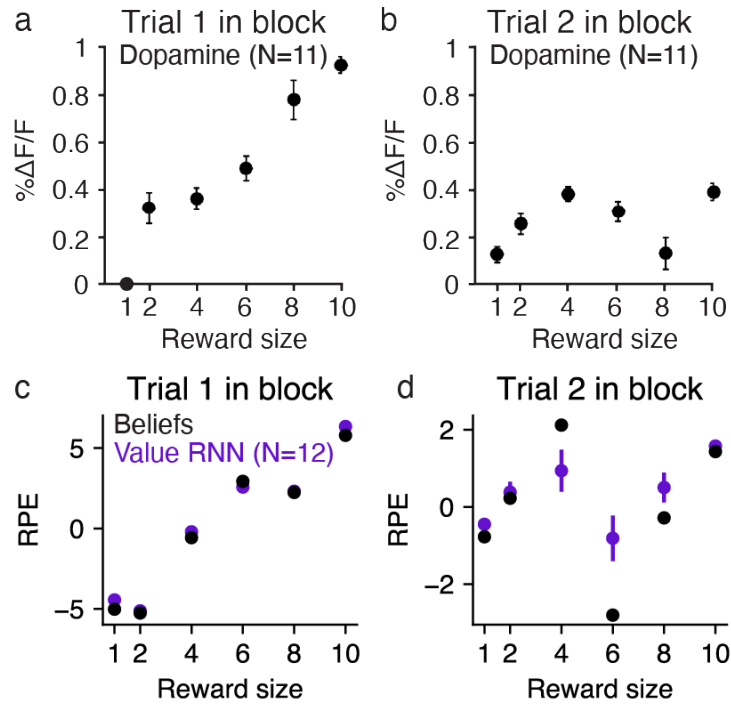

**Fig S2. Value RNNs trained on the Babayan task recapitulate dopamine activity and belief RPEs in response to intermediate reward sizes.** **a-b.** Average dopamine response on trial 1 (panel **a**) and trial 2 (panel **b**) during probe sessions including blocks with intermediate reward sizes. Circles and lines depict mean  $\pm$  SE across  $N = 11$  animals. Reproduced from Babayan et al. [10]. **c-d.** Same as panels **a-b**, but for the RPEs of the Belief model (black) and Value RNNs (purple). Value RNNs were trained on sessions including only blocks with rewards  $r_t \in \{1, 10\}$ , as in the main text. Value weights for the Belief model and Value RNNs were fit using a test session including 39 blocks each with  $r_t = 1$  and  $r_t = 10$ , and 3 blocks each with  $r_t \in \{2, 4, 6, 8\}$ , similar to the proportions used in Babayan et al. [10]. RPEs were then measured on a different test session. Purple circles and lines depict mean  $\pm$  SE across  $N = 12$  models.

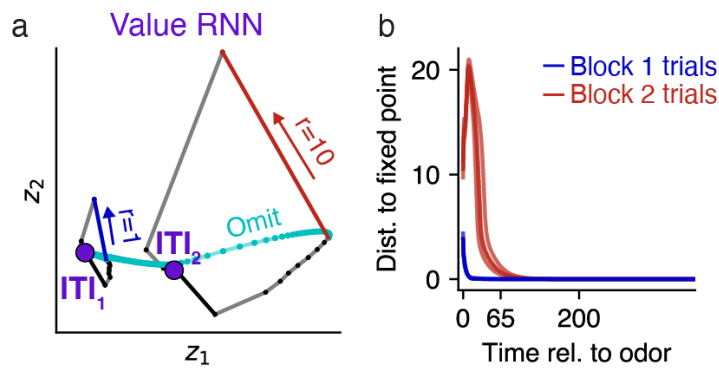

**Fig S3. Value RNNs trained on the Babayan task exhibit one fixed point.** **a.** RNN activity during two example trials, one during Block 1 (left) and the other during Block 2 (right). Same as Fig 7D. Here we also include RNN activity trajectories if each reward had been omitted. While activity for the Block 2 trial initially returns to the putative  $ITI_2$  state, it eventually returns to the true fixed point at  $ITI_1$ . **b.** Distance of RNN activity from the single fixed point (e.g.,  $ITI_1$  in panel **a**) following an odor observation (i.e., an omission trial). While the maximum ITI duration is theoretically infinite, the maximum ITI duration in the training data was at  $t = 65$ . RNN activity on Block 2 trials therefore remained separate from the activity on Block 1 trials for the range of experienced ITI durations.
